# Supplementary material for: Identification of Putative Novel Class-I Lanthipeptides in Firmicutes: A Combinatorial In Silico Analysis Approach Performed on Genome Sequenced Bacteria and a Close Inspection of Z-Geobacillin Lanthipeptide Biosynthesis Gene Cluster of the Thermophilic Geobacillus sp. Strain ZGt-1
Source: PubMed Central journal article supplement (PMC6165006; doi:10.3390/ijms19092650), 2018-09-06
Supplement: ijms-19-02650-s001.pdf [file ijms-19-02650-s001.pdf]

*Electronic Supplementary Materials*

# **Identification of Putative Novel Class-I Lanthipeptides in Firmicutes: A Combinatorial *In Silico* Analysis Approach Performed on Genome Sequenced Bacteria and a Close Inspection of Z-geobacillin Lanthipeptide Biosynthesis Gene Cluster of the Thermophilic *Geobacillus* sp. Strain ZGt-1**

**Rawana N. Alkhalili <sup>1,\*</sup> and Björn Canbäck <sup>2</sup>**

<sup>1</sup> Biotechnology, Department of Chemistry, Lund University Lund, SE-221 00, Sweden

<sup>2</sup> Department of Biology, Lund University, Lund SE-221 00, Sweden; Bjorn.Canback@biol.lu.se

\* Correspondence: Rawana.Alkhalili@biotek.lu.se

**Table S.1.** Amino acid sequences of the unmodified antiSMASH-detected lanthipeptides and the corresponding nucleotide sequences. Sequences in lower case correspond to the leader peptide. The presented gene positions are based on those predicted by antiSMASH and confirmed by BLAST analysis. When the gene start position value is larger than that of the end position, the gene is located on the reverse strand. Entries typed in bold represent data related to the putative novel lanthipeptides.

| Bacterial species, strain (lanthipeptide reference number), unmodified aa sequence of lanthipeptide                     | Bacterial species, strain (lanthipeptide reference number), lanthipeptide nucleotide sequence                                                                                                                                                                  | RefSeq genome accession number | Start position       | End position         |
|-------------------------------------------------------------------------------------------------------------------------|----------------------------------------------------------------------------------------------------------------------------------------------------------------------------------------------------------------------------------------------------------------|--------------------------------|----------------------|----------------------|
| > <i>Bacillus clausii</i> KSM-K16<br>mekafddldlevvhtkakdvqpdFTSVSFCTPGCGETGS<br>FNSFCC                                  | > <i>Bacillus clausii</i> KSM-K16<br>ATGGAAAAAGCTTTTGACTTGGATTTGGAA<br>GTAGTACACACGAAAGCGAAGGATGTACA<br>ACCAGATTTCAACAGCGTCAGTTTCTGTAC<br>TCCTGGTTGCGGGGAAACGGGTAGCTTTAA<br>TAGCTTCTGCTGCTAA                                                                   | NC_006582                      | 3706418              | 3706284              |
| > <i>Bacillus megaterium</i> QM B1551 (I)<br>mekafddldlevvhtkakdvqpdFTSVSFCTPGCGETGS<br>FNSFCC                          | > <i>Bacillus megaterium</i> QM B1551 (I)<br>ATGAATAACGTAAAAACCTTTTGATTGA<br>GATGTACAAGTAACAACCTCAAGTGAT<br>GTAGATCCACAAATTACAAGTGATCTTTA<br>TGTACACCAGGTTGTGGAGATACAGGTAGT<br>TGGAACAGCTTCTGCTGCTAA                                                           | NC_014023                      | 137678               | 137538               |
| > <i>Bacillus megaterium</i> QM B1551 (II)<br>mnnvknfldldvqvtassdvdppqITSVSLCTPGCGDT<br>GSWNSFCC                        | > <i>Bacillus megaterium</i> QM B1551 (II)<br>ATGAATAATGTAAAAACCTTTTGATTGA<br>GATGTACAAGTAACAACCTCAAGTGAT<br>GTAGATCCACAAATTACAAGTGATCTTTA<br>TGTACACCAGGTTGTGGAGATACAGGTAGC<br>TGGAACAGCTTCTGCTGCTAA                                                          | NC_014023                      | 137893               | 137753               |
| > <i>Bacillus subtilis</i> BSn5<br>meknnifddinkmestsevsaqTWTATIGKTIVQSVK<br>KCRFTFCGCSLGSNSCN                           | > <i>Bacillus subtilis</i> BSn5<br>ATGGAGAAGAATAATTTTTGACCTAGAC<br>ATTAATAAAAAGATGGAATCTACTAGTGA<br>GGTTTCTGCTCAAACCTGGGCTACAATCGG<br>AAAAACTATTGTGCAGTCTGTGAAAAAAT<br>GTAGAACATTTACTTGTGGATGTTGCTAG<br>GCTCTGCACTAAGTAACTAA                                   | NC_014976                      | 2428804              | 2428974              |
| > <i>Bacillus subtilis spizizenii</i> TU-B-10<br>mskfddfdldvkvskqdskitpqWKSESVCTPGCVT<br>GLLQTCFLQITCNCKISK             | > <i>Bacillus subtilis spizizenii</i> TU-B-10<br>ATGTCAAAGTTCGATGATTTTCGATTTGGAT<br>GTTGTGAAAGTCTCTAAGCAAGACTCAA<br>AATCACTCCTCAATGGAAAAGTGAGTCAGT<br>TTGTACACCAGGTTGTGTAACCTGGTCTATT<br>GCAAACCTGCTTCCTTCAAACAATCACTTG<br>TAACTGCAAAATCTCTAAATAA              | NC_016047                      | 3414730              | 3414560              |
| > <i>Bacillus subtilis spizizenii</i> W23<br>mskfddfdldvkvskqdskitpqWKSESLCTPGCVT<br>GALQTCFLQITCNCKISK                 | > <i>Bacillus subtilis spizizenii</i> W23<br>ATGTCAAAGTTCGATGATTTTCGATTTGGAT<br>GTTGTGAAAGTCTCTAAACAAGACTCAA<br>AATCACTCCGCAATGGAAAAGTGAATCAC<br>TTGTACACCAGGATGTGTAACCTGGTGCAT<br>TGCAAACCTGCTTCCTTCAAACAATCACTTG<br>GTAACCTGCAAAATCTCTAAATAA                 | NC_014479                      | 3256972              | 3256802              |
| > <i>Bacillus thuringiensis serovar finitimus</i> YBT-020<br>mdnksqfedfdlnlyeedysedgsvqsySSWGGTNS<br>STSIACSLTNVTEGCNWC | > <i>Bacillus thuringiensis serovar finitimus</i> YBT-020<br>ATGGACAACAAATCGCAATTTGAAGATT<br>TTGATTTAAACTATATGAAGAAATTGAT<br>TATAGTGAAGATGGATCAGTGCAATCAT<br>ACTCATCTTGGGGGGGAACGAATAGTTC<br>TACATCAATTGCATGTTCTTTATTAATA<br>ATGTTACTGAAGGATGTAATTGGTGCTA<br>A | NC_017200                      | 1205213 <sup>1</sup> | 1205383 <sup>1</sup> |

|                                                                                                                  |                                                                                                                                                                                                                                                   |           |                     |                     |
|------------------------------------------------------------------------------------------------------------------|---------------------------------------------------------------------------------------------------------------------------------------------------------------------------------------------------------------------------------------------------|-----------|---------------------|---------------------|
| > <i>Bacillus thuringiensis</i> serovar IS5056 (I)<br>mnkelfdldinkmetptemtaqTWTIVKVS KAVCK<br>TGTCICTTSCSNCK     | > <i>Bacillus thuringiensis</i> serovar IS5056 (I)<br>ATGAATAAAGA AACTATTTGATTTAGATATT<br>AATAAGAAAATGGAAACACCTACTGAAAT<br>GACAGCACAAACTTGGACA AACTATTGTTAA<br>AGTCTCAAAGGCTGTTGTAAAACAGGAA<br>CTTGTATTTGACTACTTCATGCTCTAATTG<br>TAAGTAA          | NC_020394 | 132195              | 132040              |
| > <i>Bacillus thuringiensis</i> serovar IS5056 (II)<br>mnkelfdldinkmetptemtaqTWTIVKVS KAVCK<br>TGTCICTTSCSNCK    | > <i>Bacillusthuringiensis</i> serovar IS5056 (II)<br>ATGAATAAAGA AACTATTTGATTTAGATATT<br>AATAAGAAAATGGAAACACCTACTGAAAT<br>GACAGCACAAACTTGGACA AACTATTGTTAA<br>AGTCTCAAAGGCTGTTGTAAAACAGGAA<br>CTTGTATTTGACTACTTCATGCTCTAATTG<br>TAAGTAA          | NC_020394 | 132712              | 132557              |
| > <i>Bacillus thuringiensis</i> serovar IS5056 (III)<br>mdkelfdldinkmetptemtaqTWT SILKVS RAPCKS<br>GTCLCTTSCSNCK | > <i>Bacillus thuringiensis</i> serovar IS5056 (III)<br>ATGGATAAAGA AACTATTTGATTTAGATATT<br>AATAAGAAAATGGAAACACCTACTGAAAT<br>GACAGCACAAACTTGGACTAGTATTTTAAA<br>GGTGTCAAGGGCTCCTGTAAATCAGGAAC<br>TTGTCTTTGACTACTTCATGCTCTAATTGT<br>AAATAA          | NC_020394 | 133239              | 133084              |
| > <i>Bacillus thuringiensis</i> serovar IS5056 (IV)<br>mnkelfdldinkmeaptemvtqwGTVVKVSKAICK<br>TGTCIGTISCTNCK     | > <i>Bacillus thuringiensis</i> serovar IS5056 (IV)<br>ATGAATAAAGA AACTATTTGATTTAGATATT<br>AATAAGAAAATGGAAGCACCTACTGAAAT<br>GACTGTACAAACTTGGGGAACGGTTGTTAA<br>AGTATCAAAGGCTATTTGTAAAACAGGAA<br>CTTGTATTGGCACTATTCATGCTACTAATTG<br>TAAGTAA         | NC_020394 | 133674              | 133519              |
| > <i>Bacillus thuringiensis</i> serovar IS5056 (V)<br>mnkelfdldinkmetptemtaqvPTTIFVSRVCKTL<br>TCICTISCSNCK       | > <i>Bacillus thuringiensis</i> serovar IS5056 (V)<br>ATGAATAAAGA ATTATTTGATTTAGATATT<br>AATAAGAAAATGGAAACACCTACTGAAAT<br>GACTGCACAAACTGTGCCAACAACTATTTT<br>TGTATCAAGAAGTGTGTTGTAAAACATTAAC<br>TTGTATTTGACTATTTTCATGCTCTAATTGT<br>AAGTAA          | NC_020394 | 134225              | 134070              |
| > <i>Bacillus thuringiensis</i> YBT 1518 (I)<br>mineknfldldvqvttatgdvdpqITRISACTPGCGNTG<br>SFNSFCC               | > <i>Bacillus thuringiensis</i> YBT 1518 (I)<br>ATGATTAATGAAAAAAACCTTTTTGATTTA<br>GATGTACAAGTAACAACAGCTACAGGCGA<br>TG TAGATCCACAAATTACAAGTATCTCAGC<br>TTGTACGCCCTGGTTGTGGAAACACAGGTTT<br>ATTCAATAGCTTCTGTGCTAA                                    | NC_022873 | 3953881             | 3953741             |
| > <i>Bacillus thuringiensis</i> YBT 1518 (II)<br>mineknfldldvqvttatgdvdpqITRISACTPGCGNTG<br>SFNSFCC              | > <i>Bacillus thuringiensis</i> YBT 1518 (II)<br>ATGATTAATGAAAAAAACCTTTTTGATTTA<br>GATGTACAAGTAACAACAGCTACAGGTTA<br>TG TAGATCCACAAATTACAAGAATCTCAGC<br>TTGTACGCCCTGGTTGTGGAAACACAGGTTT<br>ATTCAATAGCTTCTGTGCTAA                                   | NC_022873 | 3954071             | 3953931             |
| > <i>Geobacillus kaustophilus</i> HTA426 (I)<br>maklddflddivvkkqdnivqpnITSKSLCTPGCITGIL<br>MCLTQNSCVSCNSCIRC     | > <i>Geobacillus kaustophilus</i> HTA426 (I)<br>ATGGCAAAGTTGGATGATTTTCGATTTGGAC<br>ATTGTTGTCAAAAAACAGGACAACATTGTA<br>CAACCTAATATTACAAGTAAATCTCTTTGT<br>ACCCCGGGTTGCATCACAGGAATCTTGATG<br>TGCTTAACGCAAAATTCTTGTGTATCTTGTA<br>ACTCTTGCAATTCGATGCTAA | NC_006510 | 314934              | 315104              |
| > <i>Geobacillus kaustophilus</i> HTA426 (II)<br>maklddflddivvkkqdnivqpnITSKSLLYPGLHHR<br>HLNVLNAKFLCIL          | > <i>Geobacillus kaustophilus</i> HTA426 (II)<br>ATGGCGAAGTTGGATGATTTTCGATTTGGAC<br>ATTGTTGTCAAAAAACAGGACAACATTGTA<br>CAACCTAATATTACAAGTAAATCTCTTTTGT                                                                                             | NC_006510 | 320984 <sup>1</sup> | 321136 <sup>1</sup> |

|                                                                                                                 |                                                                                                                                                                                                                                                   |                           |                     |                     |
|-----------------------------------------------------------------------------------------------------------------|---------------------------------------------------------------------------------------------------------------------------------------------------------------------------------------------------------------------------------------------------|---------------------------|---------------------|---------------------|
|                                                                                                                 | ACCCCGGGTTGCATCACAGGCACCTTAATG<br>TGCTTAACGCAAAATTCTTGTGTATCTTGTA<br>A                                                                                                                                                                            |                           |                     |                     |
| > <i>Geobacillus</i> sp. ZGt-1<br>maklddflddivvkkqdnivqpnITSKSLCTPGCITG<br>ILMCLTQNSCVSCNSCIRC                  | > <i>Geobacillus</i> sp. ZGt-1<br>ATGGCAAAGTTGGATGATTTTCGATTTGG<br>ACATTGTTGTCAAAAAACAGGACAACAT<br>TGTACAACCTAATATTACAAGTAAATCTC<br>TTTGTACCCCGGGTTGCATCACAGGAATC<br>TTGATGTGCTTAACGCAAAATTCTTGTGT<br>ATCTTGTAACTCTTGCAATTCGATGCTAA               | LDPD01000000 <sup>2</sup> | 33624               | 33794               |
| > <i>Geobacillus thermodenitrificans</i> NG80-2<br>maklddflddivvkkqdnivqpnVTSKSLCTPGCITG<br>VLMCLTQNSCVSCNSCIRC | > <i>Geobacillus thermodenitrificans</i> NG80-2<br>ATGGCGAAGTTGATGATTTTGATTTGGAC<br>ATTGTGGTGAAAAAACAGGACGACGTGGT<br>ACAACCGAACGTGACGAGTAAATCTCTTTG<br>TACGCCAGGTTGTATCACAGGTGTGTTAAT<br>GTGTCTCACGCAAAATTCTTGTGTATCTTGT<br>AACTCTTGCATTCGATGCTAA | NC_009328                 | 298823              | 298993              |
| > <i>Geobacillus thermoleovorans</i> CCB_US3_UF5<br>maklddflddivvkkqdnivqpnITSKSLYPGLHHR<br>HLNVLNAKFLCIL       | > <i>Geobacillus thermoleovorans</i> CCB_US3_UF5<br>ATGGCGAAGTTGGATGATTTTCGATTTGGAC<br>ATTGTTGTCAAAAAACAGGACAACATTGTA<br>CAACCTAATATTACAAGTAAATCTCTTTTGT<br>ACCCCGGGTTGCATCACAGGCATCTTAATG<br>TGCTTAACGCAAAATTCTTGTGTATCTTGTA<br>A                | NC_016593                 | 362226 <sup>1</sup> | 362378 <sup>1</sup> |
| > <i>Lactococcus lactis</i> CV56<br>mstkdfnldlvsvskkdsqasprITSISLCTPGCKTGAL<br>MGCNMKTATCHCSIHVSK               | > <i>Lactococcus lactis</i> CV56<br>ATGAGTACAAAAGATTTTAACTTGGATTG<br>GTATCTGTTTGAAGAAAGATTCAGGTGCA<br>TCACCACGCATTACAAGTATTTGCTATGT<br>ACACCCGGTTGTAACAGGAGCTCTGAT<br>GGTTGTAAACATGAAAACAGCAACTTGTG<br>ATTGTAGTATTCACGTAAGCAAATAA                 | NC_017486                 | 604687              | 604860              |
| > <i>Lactococcus lactis</i> IO<br>mstkdfnldlvsvskkdsqasprITSISLCTPGCKTGAL<br>MGCNMKTATCNCISHVSK                 | > <i>Lactococcus lactis</i> IO<br>ATGAGTACAAAAGATTTTAACTTGGATTG<br>GTATCTGTTTGAAGAAAGATTCAGGTGCA<br>TCACCACGCATTACAAGTATTTGCTATGT<br>ACACCCGGTTGTAACAGGAGCTCTGAT<br>GGTTGTAAACATGAAAACAGCAACTTGTG<br>ATTGTAGTATTCACGTAAGCAAATAA                   | NC_020450                 | 599615              | 599788              |
| > <i>Paenibacillus polymyxa</i> CR1<br>mknqfdldlvaknevpkqvpaSGII<br>CTPSCATGTLNCQVSLTFCKTC                      | > <i>Paenibacillus polymyxa</i> CR1<br>ATGAAAAATCAATTTGATCTGGACTTGCAA<br>GTAGCTAAAAATGAGGTTGCTCCAAAAGG<br>AGTTCAACCAGCCAGTGGTATTATCTGTAC<br>TCCTTCATGTGCAACAGGACTTTGAATTGT<br>CAAGTTAGTCTTACCTTCTGCAAAAACGTGT<br>TAA                              | NC_023037                 | 1748588             | 1748740             |
| > <i>Paenibacillus polymyxa</i> E681<br>mknqfdldlvaknevasqpaSGLICTPSCATGTL<br>NCQVSLSFCKTC                      | > <i>Paenibacillus polymyxa</i> E681<br>ATGAAAAATCAATTTGATCTGGACTTGCAA<br>GTAGCTAAAAATGAGGTTGCTCCAAAAGG<br>GGTTCAACCAGCCAGTGGTCTTATCTGTAC<br>TCCTTCATGTGCAACAGGACTTTGAATTGT<br>CAAGTTAGTCTTACCTTCTGCAAAAACGTGT<br>TAA                             | NC_014483                 | 1558420             | 1558572             |
| > <i>Paenibacillus polymyxa</i> M1 (I)<br>mknqfdldlvaknevasqpaSGLICTPCLTSIL<br>NCYTSISHCGPC                     | > <i>Paenibacillus polymyxa</i> M1 (I)<br>ATGAAAAATCAATTTGATCTGGATTGCA<br>AGTGACCAAAAAGTGAGAGTGCTTCTAAA<br>GAGCTTCAAGCAGACAGCGGCATTATTT<br>GTACTCCTACTTGTAAACATCTATTTTAA<br>ACTGCTATACTAGCATTTCACATTGTGGA<br>CCTTGTTGA                            | NC_017542                 | 1693817             | 1693969             |

|                                                                                                       |                                                                                                                                                                                                                                      |           |         |         |
|-------------------------------------------------------------------------------------------------------|--------------------------------------------------------------------------------------------------------------------------------------------------------------------------------------------------------------------------------------|-----------|---------|---------|
| > <i>Paenibacillus polymyxa</i> M1 (II)<br>mknqfdldlvaknevpkeqpasGLICTPSCATG<br>TLNCQVSLSFCKTC        | > <i>Paenibacillus polymyxa</i> M1 (II)<br>ATGAAAAATCAATTTGATCTGGACTTGCA<br>AGTAGCCAAAAATGAGGTTGCTCCTAAA<br>GAGGTTCAACCAGCTAGCGGTCTTATCT<br>GTACTCCTTCCTGTGCAACAGGTACTTTG<br>AATTGCCAAGTTAGCCTTTCCTTCTGCAA<br>AACGTGTAA              | NC_017542 | 1695699 | 1695851 |
| > <i>Paenibacillus polymyxa</i> SC2 (I)<br>mknqfdldlvqtkesesaskelqadSGIICPTCLTSIL<br>NCYTSISHCGPC     | > <i>Paenibacillus polymyxa</i> SC2 (I)<br>ATGAAAAATCAATTTGATCTGGATTGCA<br>AGTGACCAAAAGTGAGAGTGCTTCTAAA<br>GAGCTTCAAGCAGACAGCGGCATTATTT<br>GTACTCCTACTTGTTAACATCTATTTTAA<br>ACTGCTATACTAGCATTTCACATTGTGGA<br>CCTTGTTGA               | NC_014622 | 1695159 | 1695311 |
| > <i>Paenibacillus polymyxa</i> SC2 (II)<br>mknqfdldlvaknevpkeqpasGLICTPSCATG<br>TLNCQVSLSFCKTC       | > <i>Paenibacillus polymyxa</i> SC2 (II)<br>ATGAAAAATCAATTTGATCTGGACTTGCA<br>AGTAGCCAAAAATGAGGTTGCTCCTAAA<br>GAGGTTCAACCAGCTAGCGGTCTTATCT<br>GTACTCCTTCCTGTGCAACAGGTACTTTG<br>AATTGCCAAGTTAGCCTTTCCTTCTGCAA<br>AACGTGTAA             | NC_014622 | 1697041 | 1697193 |
| > <i>Staphylococcus aureus</i> 11819-97 (I)<br>mekvldldvqvkannnsndsagdeRITSHSLCTPGCA<br>KTGSFNSFCC    | > <i>Staphylococcus aureus</i> 11819-97 (I)<br>ATGGAAAAAGTTCCTTGATTTAGACGTGCAA<br>GTTAAAGCAAACAATAACTCAAATGATT<br>AGCAGGTGACGAACGTATTACAAGTCATA<br>GTTTATGTACTCCTGGTTGTGCTAAGACTGG<br>TAGTTTTAATAGCTTCTGCTGTAA                       | NC_017351 | 1942472 | 1942329 |
| > <i>Staphylococcus aureus</i> 11819-97 (II)<br>mekvldldvqvkannntndsagdeRITSHLFCFSGCEK<br>TGSFNSFCC   | > <i>Staphylococcus aureus</i> 11819-97 (II)<br>TTGGAAAAAGTTCCTTGATTTAGACGTGCAA<br>GTTAAAGGAAATAACAACACTAATGATT<br>AGCGGGTGACGAAAGAATAACTAGCCATC<br>TTTTTTGTAGCTTTGGTTGTGAAAAGACGGG<br>TAGTTTTAACAGCTTCTGTTGTAA                      | NC_017351 | 1943352 | 1943209 |
| > <i>Staphylococcus aureus</i> Bmb9393 (I)<br>mekvldldvqvkannnsndsagdeRITSHSLCTPGCA<br>KTGSFNSFCC     | > <i>Staphylococcus aureus</i> Bmb9393 (I)<br>ATGGAAAAAGTTCCTTGATTTAGACGTGCAA<br>GTTAAAGCAAACAATAACTCAAATGATT<br>AGCAGGTGACGAACGTATTACAAGTCATA<br>GTTTATGTACTCCTGGTTGTGCTAAGACTGG<br>TAGTTTTAATAGCTTCTGCTGTAA                        | NC_021670 | 2038104 | 2037961 |
| > <i>Staphylococcus aureus</i> Bmb9393 (II)<br>mekvldldvqvkannntndsagdeRITSHLFCFSGCEK<br>TGSFNSFCC    | > <i>Staphylococcus aureus</i> Bmb9393 (II)<br>TTGGAAAAAGTTCCTTGATTTAGACGTGCAA<br>GTTAAAGGAAATAACAACACTAATGATT<br>AGCGGGTGACGAAAGAATAACTAGCCATC<br>TTTTTTGTAGCTTTGGTTGTGAAAAGACGGG<br>TAGTTTTAACAGCTTCTGTTGTAA                       | NC_021670 | 2038984 | 2038841 |
| > <i>Staphylococcus aureus</i> COL (I)<br>mekvldldvqvkannnsndsagdeRITSHSLCTPGCA<br>KTGSFNSFCC         | > <i>Staphylococcus aureus</i> COL (I)<br>ATGGAAAAAGTTCCTTGATTTAGACGTGCAA<br>GTTAAAGCAAACAATAACTCAAATGATT<br>AGCAGGTGACGAACGTATTACAAGTCATA<br>GTTTATGTACTCCTGGTTGTGCTAAGACTGG<br>TAGTTTTAATAGCTTCTGCTGTAA                            | NC_002951 | 1932028 | 1931885 |
| > <i>Staphylococcus aureus</i> COL (II)<br>mekvldldvqvkannntndsagdeRITSHLFCFSGCEK<br>TVLHQMWVWYNLKNYF | > <i>Staphylococcus aureus</i> COL (II)<br>TTGGAAAAAGTTCCTTGATTTAGACGTGCAA<br>GTTAAAGGAAATAACAACACTAATGATT<br>AGCGGGTGACGAAAGAATAACTAGCCATC<br>TTTTTTGTAGCTTTGGTTGTGAAAAGACGGT<br>TCTCCACCAAATGTGGTGGGTATATAATTT<br>AAAGAACTATTTTTAA | NC_002951 | 1934429 | 1934265 |

|                                                                                                   |                                                                                                                                                                                                                |           |         |         |
|---------------------------------------------------------------------------------------------------|----------------------------------------------------------------------------------------------------------------------------------------------------------------------------------------------------------------|-----------|---------|---------|
| > <i>Staphylococcus aureus</i> ED133 (I)<br>mekvldldvqvkakndtsdsGDERITFIGCTPGCG<br>KTGSFNSFCC     | > <i>Staphylococcus aureus</i> ED133 (I)<br>ATGGAAAATGTTCTTGATTTAGACGTACAA<br>GTAAAAGCGAAAAACGACACTTCTGATTC<br>AGCGGGTGACGAACGTATTACTAGTTTCAT<br>TGGTTGACTCCTGGTTGTGGTAAGACTGGT<br>AGTTTTAATAGCTTCTGCTGTAA     | NC_017337 | 1905359 | 1905216 |
| > <i>Staphylococcus aureus</i> ED133 (II)<br>mekvldldvqvkgnntndsaderITSHFLCSFGCGK<br>TGSFNSFCC    | > <i>Staphylococcus aureus</i> ED133 (II)<br>ATGGAAAAAGTTCTTGATTTAGACGTGCAA<br>GTTAAAGGAAATAACAACACTAATGATTC<br>AGCGGCTGACGAAAGAATAACTAGCCATT<br>TTTTATGTAGCTTTGGTTGTGGAAAGACGG<br>GTAGTTTTAACAGCTTCTGTTGTAA   | NC_017337 | 1907901 | 1907758 |
| > <i>Staphylococcus aureus</i> LGA251 (I)<br>mekvldldvqvkakndtsdsGDERITFIGCTPGCG<br>KTGSFNSFCC    | > <i>Staphylococcus aureus</i> LGA251 (I)<br>ATGGAAAATGTTCTTGATTTAGACGTACAA<br>GTAAAAGCGAAAAACGACACTTCTGATTC<br>AGCGGGTGACGAACGTATTACTAGTTTCAT<br>TGGTTGACTCCTGGTTGTGGTAAGACTGGT<br>AGTTTTAATAGCTTCTGCTGTAA    | NC_017349 | 1893217 | 1893074 |
| > <i>Staphylococcus aureus</i> LGA251 (II)<br>mekvldldvqvkgnntndsaderITSHFLCSFGCGK<br>TGSFNSFCC   | > <i>Staphylococcus aureus</i> LGA251 (II)<br>ATGGAAAAAGTTCTTGATTTAGACGTGCAA<br>GTTAAAGGAAATAACAACACTAATGATTC<br>AGCGGCTGACGAAAGAATAACTAGCCATT<br>TTTTATGTAGCTTTGGTTGTGGAAAGACGG<br>GTAGTTTTAACAGCTTCTGTTGTAA  | NC_017349 | 1894096 | 1893953 |
| > <i>Staphylococcus aureus</i> M1 (I)<br>mekvldldvqvkannsndsagdeRITSHSLCTPGCA<br>KTGSFNSFC        | > <i>Staphylococcus aureus</i> M1 (I)<br>ATGGAAAAAGTTCTTGATTTAGACGTGCAA<br>GTTAAAGCAAACAATAACTCAAATGATTC<br>AGCAGGTGACGAACGTATTACAAGTCATA<br>GTTTATGACTCCTGGTTGTGCTAAGACTGG<br>TAGTTTTAATAGCTTCTGCTGTAA        | NC_021059 | 1944795 | 1944652 |
| > <i>Staphylococcus aureus</i> M1 (II)<br>mekvldldvqvkgnntndsagdeRITSHLFCFSGCEK<br>TGSFNSFCC      | > <i>Staphylococcus aureus</i> M1 (II)<br>TTGGAAAAAGTTCTTGATTTAGACGTGCAA<br>GTTAAAGGAAATAACAACACTAATGATTC<br>AGCGGGTGACGAAAGAATAACTAGCCATC<br>TTTTTTGTAGCTTTGGTTGTGAAAAGACGGG<br>TAGTTTTAACAGCTTCTGTTGTAA      | NC_021059 | 1945675 | 1945532 |
| > <i>Staphylococcus aureus</i> MSSA476 (I)<br>mekvldldvqvkannsndsagdeRITSHSLCTPGCA<br>KTGSFNSFCC  | > <i>Staphylococcus aureus</i> MSSA476 (I)<br>ATGGAAAAAGTTCTTGATTTAGACGTGCAA<br>GTTAAAGCAAACAATAACTCAAATGATTC<br>AGCAGGTGACGAACGTATTACAAGTCATA<br>GTTTATGACTCCTGGTTGTGCTAAGACTGG<br>TAGTTTTAATAGCTTCTGCTGTAA   | NC_002953 | 1896691 | 1896548 |
| > <i>Staphylococcus aureus</i> MSSA476 (II)<br>mekvldldvqvkgnntndsagdeRITSHLFCFSGCEK<br>TGSFNSFCC | > <i>Staphylococcus aureus</i> MSSA476 (II)<br>TTGGAAAAAGTTCTTGATTTAGACGTGCAA<br>GTTAAAGGAAATAACAACACTAATGATTC<br>AGCGGGTGACGAAAGAATAACTAGCCATC<br>TTTTTTGTAGCTTTGGTTGTGAAAAGACGGG<br>TAGTTTTAACAGCTTCTGTTGTAA | NC_002953 | 1897571 | 1897428 |
| > <i>Staphylococcus aureus</i> MW2 (I)<br>mekvldldvqvkannsndsagdeRITSHSLCTPGCA<br>KTGSFNSFCC      | > <i>Staphylococcus aureus</i> MW2 (I)<br>ATGGAAAAAGTTCTTGATTTAGACGTGCAA<br>GTTAAAGCAAACAATAACTCAAATGATTC<br>AGCAGGTGACGAACGTATTACAAGTCATA<br>GTTTATGACTCCTGGTTGTGCTAAGACTGG<br>TAGTTTTAATAGCTTCTGCTGTAA       | NC_003923 | 1917357 | 1917214 |
| > <i>Staphylococcus aureus</i> MW2 (II)<br>mekvldldvqvkgnntndsagdeRITSHLFCFSGCEK<br>TGSFNSFCC     | > <i>Staphylococcus aureus</i> MW2 (II)<br>TTGGAAAAAGTTCTTGATTTAGACGTGCAA<br>GTTAAAGGAAATAACAACACTAATGATTC<br>AGCGGGTGACGAAAGAATAACTAGCCATC<br>TTTTTTGTAGCTTTGGTTGTGAAAAGACGGG                                 | NC_003923 | 1918237 | 1918094 |

|                                                                                                     |                                                                                                                                                                                                                        |           |         |         |
|-----------------------------------------------------------------------------------------------------|------------------------------------------------------------------------------------------------------------------------------------------------------------------------------------------------------------------------|-----------|---------|---------|
|                                                                                                     | TAGTTTTAACAGCTTCTGTGTAA                                                                                                                                                                                                |           |         |         |
| > <i>Staphylococcus aureus</i> NCTC 8325 (I)<br>mekvldldvqvkannnsndsagdeRITSHSLCTPGCA<br>KTGSFNSFCC | > <i>Staphylococcus aureus</i> NCTC 8325 (I)<br>ATGGAAAAAGTTCCTTGATTTAGACGTGCAA<br>GTTAAAGCAAACAATAACTCAAATGATTC<br>AGCAGGTGACGAACGTATTACAAGTCATA<br>GTTTATGTACTCCTGGTTGTGCTAAGACTGG<br>TAGTTTTAATAGCTTCTGCTGTAA       | NC_007795 | 1857888 | 1857745 |
| > <i>Staphylococcus aureus</i> NCTC 8325 (II)<br>lekvlldlvqvkgnntndsagdeRITSHLFCFSGCE<br>KTGSFNSFCC | > <i>Staphylococcus aureus</i> NCTC 8325 (II)<br>TTGGAAAAAGTTCCTTGATTTAGACGTGCAA<br>AGTTAAAGGAAATAACAACACTAATGAT<br>TCAGCGGGTGACGAAAGAATAACTAGCC<br>ATCTTTTTGTAGCTTTGGTTGTGAAAAG<br>ACGGGTAGTTTTAACAGCTTCTGTTGTTA<br>A | NC_007795 | 1858768 | 1858625 |
| > <i>Staphylococcus aureus</i> Newman (I)<br>mekvldldvqvkannnsndsagdeRITSHSLCTPGCA<br>KTGSFNSFCC    | > <i>Staphylococcus aureus</i> Newman (I)<br>ATGGAAAAAGTTCCTTGATTTAGACGTGCAA<br>GTTAAAGCAAACAATAACTCAAATGATTC<br>AGCAGGTGACGAACGTATTACAAGTCATA<br>GTTTATGTACTCCTGGTTGTGCTAAGACTGG<br>TAGTTTTAATAGCTTCTGCTGTAA          | NC_009641 | 1914736 | 1914593 |
| > <i>Staphylococcus aureus</i> Newman (II)<br>mekvldldvqvkgnntndsagdeRITSHLFCFSGCEK<br>TGSFNSFCC    | > <i>Staphylococcus aureus</i> Newman (II)<br>TTGGAAAAAGTTCCTTGATTTAGACGTGCAA<br>GTTAAAGGAAATAACAACACTAATGATTC<br>AGCGGGTGACGAAAGAATAACTAGCCATC<br>TTTTTGTAGCTTTGGTTGTGAAAAGACGGG<br>TAGTTTTAACAGCTTCTGTGTAA           | NC_009641 | 1915616 | 1915473 |
| > <i>Staphylococcus aureus</i> RF122 (I)<br>menvldldvqvkakndtsdsGDERITSFIGCTPGCG<br>KTGSFNSFCC      | > <i>Staphylococcus aureus</i> RF122 (I)<br>ATGGAAAATGTTCTTGATTTAGACGTACAA<br>GTTAAAGCGAAAAACGACACTTCTGATTC<br>AGCGGGTGACGAACGTATTACTAGTTTCAT<br>TGGTTGTACTCCTGGTTGTGTAAGACTGGT<br>AGTTTTAATAGCTTCTGCTGTAA             | NC_007622 | 1829509 | 1829366 |
| > <i>Staphylococcus aureus</i> RF122 (II)<br>mekvldldvqvkgnntndsagdeRITSHFLCSFGCGK<br>TGSFNSFCC     | > <i>Staphylococcus aureus</i> RF122 (II)<br>ATGGAAAAAGTTCCTTGATTTAGACGTGCAA<br>GTTAAAGGAAATAACAACACTAATGATTC<br>AGCGGGTGACGAAAGAATAACTAGCCATT<br>TTTTATGTAGCTTTGGTTGTGAAAAGACGG<br>GTAGTTTTAACAGCTTCTGTGTAA           | NC_007622 | 1830386 | 1830243 |
| > <i>Staphylococcus aureus</i> T0131 (I)<br>mekvldldvqvkannnsndsagdeRITSHSLCTPGCA<br>KTGSFNSFCC     | > <i>Staphylococcus aureus</i> T0131 (I)<br>ATGGAAAAAGTTCCTTGATTTAGACGTGCAA<br>GTTAAAGCAAACAATAACTCAAATGATTC<br>AGCAGGTGACGAACGTATTACAAGTCATA<br>GTTTATGTACTCCTGGTTGTGCTAAGACTGG<br>TAGTTTTAATAGCTTCTGCTGTAA           | NC_017347 | 1932461 | 1932318 |
| > <i>Staphylococcus aureus</i> T0131 (II)<br>mekvldldvqvkgnntndsagdeRITSHLFCFSGCEK<br>TGSFNSFCC     | > <i>Staphylococcus aureus</i> T0131 (II)<br>TTGGAAAAAGTTCCTTGATTTAGACGTGCAA<br>GTTAAAGGAAATAACAACACTAATGATTC<br>AGCGGGTGACGAAAGAATAACTAGCCATC<br>TTTTTGTAGCTTTGGTTGTGAAAAGACGGG<br>TAGTTTTAACAGCTTCTGTGTAA            | NC_017347 | 1933341 | 1933198 |
| > <i>Staphylococcus aureus</i> TW20 (I)<br>mekvldldvqvkannnsndsagdeRITSHSLCTPGCA<br>KTGSFNSFCC      | > <i>Staphylococcus aureus</i> TW20 (I)<br>ATGGAAAAAGTTCCTTGATTTAGACGTGCAA<br>GTTAAAGCAAACAATAACTCAAATGATTC<br>AGCAGGTGACGAACGTATTACAAGTCATA<br>GTTTATGTACTCCTGGTTGTGCTAAGACTGG<br>TAGTTTTAATAGCTTCTGCTGTAA            | NC_017331 | 1978007 | 1977864 |
| > <i>Staphylococcus aureus</i> TW20 (II)<br>mekvldldvqvkgnntndsagdeRITSHLFCFSGCEK<br>TGSFNSFCC      | > <i>Staphylococcus aureus</i> TW20 (II)<br>TTGGAAAAAGTTCCTTGATTTAGACGTGCAA<br>GTTAAAGGAAATAACAACACTAATGATTC                                                                                                           | NC_017331 | 1978887 | 1978744 |

|                                                                                                                         |                                                                                                                                                                                                                                                                             |           |         |         |
|-------------------------------------------------------------------------------------------------------------------------|-----------------------------------------------------------------------------------------------------------------------------------------------------------------------------------------------------------------------------------------------------------------------------|-----------|---------|---------|
|                                                                                                                         | AGCGGGTGACGAAAGAATAACTAGCCATC<br>TTTTTTGTAGCTTTGGTTGTGAAAAGACGGG<br>TAGTTTTAACAGCTTCTGTTGTTAA                                                                                                                                                                               |           |         |         |
| > <i>Staphylococcus aureus</i> USA300 FPR3757 (I)<br>mekvldldvqvkannnsndsagdeRITSHSLCTPGCA<br>KTGSFNSFCC                | > <i>Staphylococcus aureus</i> USA300 FPR3757(I)<br>ATGGAAAAAGTTCCTTGATTTAGACGTGCAA<br>GTTAAAGCAAACAATAACTCAAATGATTC<br>AGCAGGTGACGAACGTATTACAAGTCATA<br>GTTTATGTACTCCTGGTTGTGCTAAGACTGG<br>TAGTTTTAATAGCTTCTGCTGTTAA                                                       | NC_007793 | 1954197 | 1954054 |
| > <i>Staphylococcus aureus</i> USA300 FPR3757 (II)<br>mekvldldvqvkgnntndsagdeRITSHLFCFSGCEK<br>TGSFNSFCC                | > <i>Staphylococcus aureus</i> USA300 FPR3757 (II)<br>TTGGAAAAAGTTCCTTGATTTAGACGTGCAA<br>GTTAAAGGAAATAACAACACTAATGATTC<br>AGCGGGTGACGAAAGAATAACTAGCCATC<br>TTTTTTGTAGCTTTGGTTGTGAAAAGACGGG<br>TAGTTTTAACAGCTTCTGTTGTTAA                                                     | NC_007793 | 1955077 | 1954934 |
| > <i>Staphylococcus aureus</i> USA300_TCH1516 (I)<br>mekvldldvqvkannnsndsagdeRITSHSLCTPGCA<br>KTGSFNSFCC                | > <i>Staphylococcus aureus</i> USA300_TCH1516 (I)<br>ATGGAAAAAGTTCCTTGATTTAGACGTGCAA<br>GTTAAAGCAAACAATAACTCAAATGATTC<br>AGCAGGTGACGAACGTATTACAAGTCATA<br>GTTTATGTACTCCTGGTTGTGCTAAGACTGG<br>TAGTTTTAATAGCTTCTGCTGTTAA                                                      | NC_010079 | 1954946 | 1954803 |
| > <i>Staphylococcus aureus</i> USA300_TCH1516 (II)<br>mekvldldvqvkgnntndsagdeRITSHLFCFSGCEK<br>TGSFNSFCC                | > <i>Staphylococcus aureus</i> USA300_TCH1516 (II)<br>TTGGAAAAAGTTCCTTGATTTAGACGTGCAA<br>GTTAAAGGAAATAACAACACTAATGATTC<br>AGCGGGTGACGAAAGAATAACTAGCCATC<br>TTTTTTGTAGCTTTGGTTGTGAAAAGACGGG<br>TAGTTTTAACAGCTTCTGTTGTTAA                                                     | NC_010079 | 1955826 | 1955683 |
| > <i>Staphylococcus aureus</i> VC40 (I)<br>mekvldldvqvkannnsndsagdeRITSHSLCTPGCA<br>KTGSFNSFCC                          | > <i>Staphylococcus aureus</i> VC40 (I)<br>ATGGAAAAAGTTCCTTGATTTAGACGTGCAA<br>GTTAAAGCAAACAATAACTCAAATGATTC<br>AGCAGGTGACGAACGTATTACAAGTCATA<br>GTTTATGTACTCCTGGTTGTGCTAAGACTGG<br>TAGTTTTAATAGCTTCTGCTGTTAA                                                                | NC_016912 | 1815518 | 1815375 |
| > <i>Staphylococcus aureus</i> VC40 (II)<br>mekvldldvqvkgnntndsagdeRITSHLFCFSGCEK<br>TGSFNSFCC                          | > <i>Staphylococcus aureus</i> VC40 (II)<br>TTGGAAAAAGTTCCTTGATTTAGACGTGCAA<br>GTTAAAGGAAATAACAACACTAATGATTC<br>AGCGGGTGACGAAAGAATAACTAGCCATC<br>TTTTTTGTAGCTTTGGTTGTGAAAAGACGGG<br>TAGTTTTAACAGCTTCTGTTGTTAA                                                               | NC_016912 | 1816398 | 1816255 |
| > <i>Staphylococcus aureus</i> Z172 (I)<br>mekvldldvqvkannnsndsagdeRITSHSLCTPGCA<br>KTGSFNSFCC                          | > <i>Staphylococcus aureus</i> Z172 (I)<br>ATGGAAAAAGTTCCTTGATTTAGACGTGCAA<br>GTTAAAGCAAACAATAACTCAAATGATTC<br>AGCAGGTGACGAACGTATTACAAGTCATA<br>GTTTATGTACTCCTGGTTGTGCTAAGACTGG<br>TAGTTTTAATAGCTTCTGCTGTTAA                                                                | NC_022604 | 1976108 | 1975965 |
| > <i>Staphylococcus aureus</i> Z172 (II)<br>mekvldldvqvkgnntndsagdeRITSHLFCFSGCEK<br>TGSFNSFCC                          | > <i>Staphylococcus aureus</i> Z172 (II)<br>TTGGAAAAAGTTCCTTGATTTAGACGTGCAA<br>GTTAAAGGAAATAACAACACTAATGATTC<br>AGCGGGTGACGAAAGAATAACTAGCCATC<br>TTTTTTGTAGCTTTGGTTGTGAAAAGACGGG<br>TAGTTTTAACAGCTTCTGTTGTTAA                                                               | NC_022604 | 1978319 | 1978176 |
| > <i>Streptococcus intermedius</i> B196<br>msnhddfqltdnkvndndqevrGPLSWLGGTVLT<br>SIVTGCTGDCLTRHCADNVTKNTGCTVTH<br>PRCKR | > <i>Streptococcus intermedius</i> B196<br>ATGTCAAATCATGATGATTTTCAATTAGA<br>TACAAACAAAGTTAATTTTGATAATGATC<br>AAGAAGTAAGAGGTCCGCTTTCTTGGCT<br>AGGCGGAACAGTATTAACCTCAATAGTT<br>ACAGGCTGCACAGGAGATTGTTTAAACAA<br>GGCACTGTGCCGATAATGTTACAAAAAA<br>TACAGGCTGTACAGTTACGCATCCTAGAT | NC_022246 | 590584  | 590793  |



## GTAAAAGGTAG

|                                                                                                             |                                                                                                                                                                                                                                               |           |         |         |
|-------------------------------------------------------------------------------------------------------------|-----------------------------------------------------------------------------------------------------------------------------------------------------------------------------------------------------------------------------------------------|-----------|---------|---------|
| > <i>Streptococcus intermedius</i> C270<br>mstkdfnldlvsvsktdagasprVTSVFMCTPGCVTGA<br>LMGCNLQTATCNCHVHISK    | > <i>Streptococcus intermedius</i> C270<br>ATGAGTACGAAAGATTTAACTTAGATTG<br>GTTTCTGTTTCAAAAACAGATGCTGGTGCTT<br>CACCTCGTGTACTAGTGTGTTTATGTGTAC<br>TCCAGGTTGTGTAAGTGGTCTTTGATGGGT<br>TGTAAGTGCAAAACAGCTACATGTAAGTGT<br>CATGTTACATTAGTAAATAA      | NC_022237 | 1010608 | 1010435 |
| > <i>Streptococcus pasteurianus</i> ATCC 43144<br>mnnedfnldlvtskennsgasprVTSKSLCTPGCKTGI<br>LMTCAIKTATCGCHF | > <i>Streptococcus pasteurianus</i> ATCC 43144<br>ATGAACAATGAAGATTTAATTTGGATCTT<br>GTCACAATCTCAAAGGAAAACAACACTCAGG<br>AGCTTCACCTCGGGTAACTAGTAAATCATT<br>ATGTACTCCTGGATGTAAGACGGGTATTTT<br>GATGACCTGTGCAATCAAAAACGCAACTTG<br>TGTTGCCATTTGGATAA | NC_015600 | 1148270 | 1148103 |
| > <i>Streptococcus pyogenes</i> MGAS6180<br>mnntikdfldldlknkddatpyVGSRYLCTPGSCWKL<br>VCFTTTVK               | > <i>Streptococcus pyogenes</i> MGAS6180<br>ATGAATAACACAATTAAGACTTTGATCTC<br>GATTTGAAAACAAATAAAAAAGACACTGC<br>TACACCTTATGTTGGTAGCCGTTACCTATGT<br>ACCCCTGGTCTTGTGGAAATTAGTTTGCT<br>TTACAACAACACTGTAAATAA                                       | NC_007296 | 804231  | 804371  |
| > <i>Streptococcus pyogenes</i> MGAS9429<br>mnntikdfldldlknkddatpyVGSRYLCTPGSCWKL<br>VCFTTTVK               | > <i>Streptococcus pyogenes</i> MGAS9429<br>ATGAATAACACAATTAAGACTTTGATCTC<br>GATTTGAAAACAAATAAAAAAGACACTGC<br>TACACCTTATGTTGGTAGCCGTTACCTATGT<br>ACCCCTGGTCTTGTGGAAATTAGTTTGCT<br>TTACAACAACACTGTAAATAA                                       | NC_008021 | 885676  | 885816  |
| > <i>Streptococcus pyogenes</i> MGAS10270<br>mnntikdfldldlknkddatpyVGSRYLCTPGSCWKL<br>VCFTTTVK              | > <i>Streptococcus pyogenes</i> MGAS10270<br>ATGAATAACACAATTAAGACTTTGATCTC<br>GATTTGAAAACAAATAAAAAAGACACTGC<br>TACACCTTATGTTGGTAGCCGTTACCTATGT<br>ACCCCTGGTCTTGTGGAAATTAGTTTGCT<br>TTACAACAACACTGTAAATAA                                      | NC_008022 | 876632  | 876772  |
| > <i>Streptococcus pyogenes</i> MGAS10750<br>mnttikdfldldlknkddatpyVGSRYLCTPGSCWKL<br>VCFTTTVK              | > <i>Streptococcus pyogenes</i> MGAS10750<br>ATGACTAACACAATTAAGACTTTGATCTC<br>GATTTGAAAACAAATAAAAAAGACACTGC<br>TACACCTTATGTTGGTAGCCGTTACCTATGT<br>ACCCCTGGTCTTGTGGAAATTAGTTTGCT<br>TTACAACAACACTGTAAATAA                                      | NC_008024 | 907659  | 907799  |
| > <i>Streptococcus suis</i> JS14<br>mnnedfnldlvtskennsgasprVTSKSLCTPGCKTGI<br>LMTCAIKTATCGCHF               | > <i>Streptococcus suis</i> JS14<br>ATGAACAATGAAGATTTAATTTGGATCTT<br>GTCACAATCTCAAAGGAAAACAACACTCAGG<br>AGCTTCACCTCGGGTAACTAGTAAATCATT<br>ATGTACTCCTGGATGTAAGACGGGTATTTT<br>GATGACCTGTGCAATCAAAAACGCAACTTG<br>TGTTGCCATTTGGATAA               | NC_017618 | 646342  | 646509  |
| > <i>Streptococcus suis</i> SC070731<br>mnnedfnldlvtskennsgasprVTSKSLCTPGCKTGI<br>LMTCAIKTATCGCHF           | > <i>Streptococcus suis</i> SC070731<br>ATGAACAATGAAGATTTAATTTGGATCTT<br>GTCACAATCTCAAAGGAAAACAACACTCAGG<br>AGCTTCACCTCGGGTAACTAGTAAATCATT<br>ATGTACTCCTGGATGTAAGACGGGTATTTT<br>GATGACCTGTGCAATCAAAAACGCAACTTG<br>TGTTGCCATTTGGATAA           | NC_020526 | 650359  | 650526  |

<sup>1</sup> The presented gene positions are based on those predicted by antiSMASH 3.0 and confirmed by BLAST analysis.

<sup>2</sup> The presented genome sequence accession number for *Geobacillus* sp. ZGt-1 belongs to the original genome record; the whole genome shotgun (WGS) project.

**Table S.2.** The antiSMASH-predicted lanthipeptides whose coding genes have either been unannotated, inaccurately annotated, or annotated as coding for “hypothetical” proteins or generally as “antibiotics”.

| Bacterial species, strain (lanthipeptide reference number) <sup>1</sup> | Refseq genome accession number | Annotation of the predicted lanthipeptide |                                        | Identity to experimentally verified lanthipeptide <sup>2</sup> | Reference <sup>3</sup>   |
|-------------------------------------------------------------------------|--------------------------------|-------------------------------------------|----------------------------------------|----------------------------------------------------------------|--------------------------|
|                                                                         |                                | Original genome record                    | RefSeq genome record                   |                                                                |                          |
| <i>Bacillus clausii</i> KSM-K16                                         | NC_006582                      | Unannotated                               | “Gallidermin/nisin family lantibiotic” | 56% clausin                                                    | [30], and this study     |
| <i>Bacillus megaterium</i> QM B1551 (I)                                 | NC_014023                      | “Antibiotic protein, putative”            | “Gallidermin/nisin family lantibiotic” | 56% gallidermin                                                | [31], and this study     |
| <i>Bacillus megaterium</i> QM B1551 (II)                                | NC_014023                      | “Antibiotic protein, putative”            | “Gallidermin/nisin family lantibiotic” | 56% gallidermin                                                | [31], and this study     |
| <i>Bacillus subtilis</i> BSn5                                           | NC_014976                      | “Hypothetical”                            | “Hypothetical”                         | 100% subtilomycin                                              | [32], and this study     |
| <i>Bacillus subtilis spizizenii</i> W23                                 | NC_014479                      | “Hypothetical”                            | “Gallidermin/nisin family lantibiotic” | 100% subtilin                                                  | This study               |
| <i>Bacillus thuringiensis</i> serovar finitimus YBT-020                 | NC_017200                      | “Hypothetical”                            | Unannotated                            | No hits                                                        | This study               |
| <i>Bacillus thuringiensis</i> serovar IS5056 (I)                        | NC_020394                      | “Hypothetical”                            | “Hypothetical”                         | 100% thuricin 4A-4                                             | [31], and this study     |
| <i>Bacillus thuringiensis</i> serovar IS5056 (II)                       | NC_020394                      | “Hypothetical”                            | “Hypothetical”                         | 100% thuricin 4A-4                                             | [31], and this study     |
| <i>Bacillus thuringiensis</i> serovar IS5056 (III)                      | NC_020394                      | “Hypothetical”                            | “Hypothetical”                         | 86% thuricin 4A-4                                              | [31], and this study     |
| <i>Bacillus thuringiensis</i> serovar IS5056 (IV)                       | NC_020394                      | “Hypothetical”                            | “Hypothetical”                         | 84% thuricin 4A-4                                              | [31], and this study     |
| <i>Bacillus thuringiensis</i> serovar IS5056 (V)                        | NC_020394                      | “Hypothetical”                            | “Hypothetical”                         | 82% thuricin 4A-4                                              | [31], and this study     |
| <i>Bacillus thuringiensis</i> YBT 1518 (I)                              | NC_022873                      | “Antibiotic protein, putative”            | “Gallidermin/nisin family lantibiotic” | 53% gallidermin                                                | This study               |
| <i>Bacillus thuringiensis</i> YBT 1518 (II)                             | NC_022873                      | “Antibiotic protein, putative”            | “Gallidermin/nisin family lantibiotic” | 51% gallidermin                                                | This study               |
| <i>Geobacillus thermoleovorans</i> CCB_US3_UF5                          | NC_016593                      | Unannotated                               | Partly inaccurately annotated gene     | 79% geobacillin I                                              | This study               |
| <i>Paenibacillus polymyxa</i> CR1                                       | NC_023037                      | “Subtilin lantibiotic” <sup>4</sup>       | “Hypothetical”                         | 94% paenilan                                                   | [36, 37], and this study |
| <i>Paenibacillus polymyxa</i> E681                                      | NC_014483                      | “Subtilin lantibiotic” <sup>4</sup>       | “Gallidermin/nisin family lantibiotic” | 100% paenilan                                                  | [36], and this study     |
| <i>Paenibacillus polymyxa</i> M1 (I)                                    | NC_017542                      | Unannotated                               | “Hypothetical”                         | 64% paenilan                                                   | This study               |
| <i>Paenibacillus polymyxa</i> M1 (II)                                   | NC_017542                      | Unannotated                               | “Hypothetical”                         | 96% paenilan                                                   | This study               |
| <i>Paenibacillus polymyxa</i> SC2 (I)                                   | NC_014622                      | Partly inaccurately annotated gene        | “Hypothetical”                         | 64% paenilan                                                   | [30], and this study     |
| <i>Paenibacillus polymyxa</i> SC2 (II)                                  | NC_014622                      | “Subtilin lantibiotic” <sup>4</sup>       | “Hypothetical”                         | 96% paenilan                                                   | This study               |
| <i>Staphylococcus aureus</i> 11819-97 (II)                              | NC_017351                      | Unannotated                               | “Gallidermin/nisin family lantibiotic” | 83% BsaA2                                                      | This study               |
| <i>Staphylococcus aureus</i> COL (II)                                   | NC_002951                      | Unannotated                               | “Gallidermin/nisin family lantibiotic” | 79% BsaA2                                                      | This study               |
| <i>Staphylococcus aureus</i> ED133 (I)                                  | NC_017337                      | “Hypothetical”                            | “Gallidermin/nisin family lantibiotic” | 100% BacCH91                                                   | This study               |
| <i>Staphylococcus aureus</i> ED133 (II)                                 | NC_017337                      | “Hypothetical”                            | “Gallidermin/nisin family lantibiotic” | 85% BsaA2                                                      | [30], and this study     |
| <i>Staphylococcus aureus</i> M1 (II)                                    | NC_021059                      | Unannotated                               | “Gallidermin/nisin family lantibiotic” | 83% BsaA2                                                      | This study               |
| <i>Staphylococcus aureus</i> MSSA476 (I)                                | NC_002953                      | “Putative                                 | “Gallidermin/nisin                     | 100% BsaA2                                                     | [8], and this            |

|                                                  |           |                  |                                        |                        |                      |
|--------------------------------------------------|-----------|------------------|----------------------------------------|------------------------|----------------------|
|                                                  |           | isochorismatase" | family lantibiotic"                    |                        | study                |
| <i>Staphylococcus aureus</i> NCTC 8325 (II)      | NC_007795 | Unannotated      | Unannotated                            | 83% BsaA2              | This study           |
| <i>Staphylococcus aureus</i> RF122 (I)           | NC_007622 | "Hypothetical"   | "Gallidermin/nisin family lantibiotic" | 100% BacCH91           | [15], and this study |
| <i>Staphylococcus aureus</i> RF122 (II)          | NC_007622 | "Hypothetical"   | "Gallidermin/nisin family lantibiotic" | 87% identical to BsaA2 | [8], and this study  |
| <i>Staphylococcus aureus</i> T0131 (II)          | NC_017347 | Unannotated      | "Gallidermin/nisin family lantibiotic" | 83% BsaA2              | This study           |
| <i>Staphylococcus aureus</i> USA300 FPR3757 (II) | NC_007793 | Unannotated      | "Gallidermin/nisin family lantibiotic" | 83% BsaA2              | This study           |
| <i>Staphylococcus aureus</i> USA300_TCH1516 (II) | NC_010079 | Unannotated      | "Gallidermin/nisin family lantibiotic" | 83% BsaA2              | This study           |
| <i>Staphylococcus aureus</i> Z172 (II)           | NC_022604 | Unannotated      | "Gallidermin/nisin family lantibiotic" | 83% BsaA2              | This study           |
| <i>Streptococcus intermedius</i> B196            | NC_022246 | Unannotated      | "Hypothetical"                         | No hits                | This study           |
| <i>Streptococcus intermedius</i> C270            | NC_022237 | "Hypothetical"   | "Gallidermin/nisin family lantibiotic" | 81% nisin F            | This study           |
| <i>Streptococcus pyogenes</i> MGAS9429           | NC_008021 | Unannotated      | "Gallidermin/nisin family lantibiotic" | 100% streptin          | This study           |
| <i>Streptococcus suis</i> JS14                   | NC_017618 | Unannotated      | "Gallidermin/nisin family lantibiotic" | 100% suicin 90-1330    | This study           |
| <i>Streptococcus suis</i> SC070731               | NC_020526 | Unannotated      | "Gallidermin/nisin family lantibiotic" | 100% suicin 90-1330    | This study           |

<sup>1</sup> The lanthipeptide aa sequence is presented in Table S1.

<sup>2</sup> Identity % to experimentally proved lanthipeptides is based on BAGEL BLAST, literature, or both.

<sup>3</sup> The cited references represent studies where the aa sequence of the respective lanthipeptide (or its core peptide) was determined either based on an *in silico* analysis or experimental investigation.

<sup>4</sup> Incorrectly annotated as subtilin. The aa sequences of the lanthipeptides do not match with that of the experimentally confirmed "lantibiotic subtilin" (AAB91589; WP\_003220055) produced by *B. subtilis*.

**Table S3.** BLASTp results of the proteins coded by the Z-geobacillin biosynthesis gene cluster of *Geobacillus* sp. strain ZGt-1. blastp was run against the non-redundant protein sequences (nr) database.

| Protein | Gene id <sup>1</sup> | Protein description                                                                                     | Accession number          | Identity | Query Coverage   | E-value |
|---------|----------------------|---------------------------------------------------------------------------------------------------------|---------------------------|----------|------------------|---------|
| ZgeoA   | 6_34                 | MULTISPECIES: gallidermin/nisin family lantibiotic [Bacillaceae]                                        | WP_011229795              | 100%     | 100%             | 2e-31   |
| ZgeoB   | 6_44                 | MULTISPECIES: lantibiotic biosynthesis protein SpaB [ <i>Geobacillus</i> ]                              | WP_014194788              | 100%     | 100%             | 0.0     |
| ZgeoT   | 6_45                 | MULTISPECIES: ABC transporter ATP-binding protein [ <i>Geobacillus</i> ]                                | WP_025038888              | 100%     | 35% <sup>2</sup> | 0.0     |
| ZgeoC   | 6_46                 | MULTISPECIES: lanthionine synthetase C family protein [ <i>Geobacillus</i> ]                            | WP_020279663              | 100%     | 100%             | 0.0     |
| ZgeoR   | 6_47                 | Two component transcriptional regulator, winged helix [ <i>Geobacillus thermoleovorans</i> CCB_US3_UF5] | AEV17716.1 <sup>3</sup>   | 100%     | 100%             | 3e-167  |
| ZgeoK   | 6_48                 | MULTISPECIES: sensor histidine kinase [ <i>Geobacillus</i> ]                                            | WP_011229815              | 100%     | 100%             | 0.0     |
| ZgeoI   | 6_49                 | MULTISPECIES: NisI/SpaI family lantibiotic immunity lipoprotein [ <i>Geobacillus</i> ]                  | WP_025039376              | 100%     | 100%             | 8e-102  |
| ZgeoG   | 6_50                 | MULTISPECIES: lantibiotic immunity ABC transporter MutG family permease subunit [Bacillaceae]           | WP_004888811 <sup>4</sup> | 100%     | 100%             | 1e-170  |
| ZgeoE   | 6_52                 | lantibiotic ABC transporter permease [ <i>Geobacillus thermoleovorans</i> B23]                          | GAJ60336 <sup>5</sup>     | 100%     | 100%             | 2e-175  |
| ZgeoF   | 6_53                 | MULTISPECIES: lantibiotic ABC transporter ATP-binding protein [ <i>Geobacillus</i> ]                    | WP_008881431              | 100%     | 100%             | 2e-162  |

<sup>1</sup> Gene identity is presented as contig, and running number of the predicted genes within the contig. The contig numbers are the same as found in the NCBI genome record (LDPD01000000).

<sup>2</sup> The low matching identity is explained by the 3288 undetermined nucleotides in the gene sequence.

<sup>3</sup> The protein hit has 5 more amino acids at the N-terminal as compared to the antiSMASH 3.0-predicted lanthipeptide.

<sup>4</sup> The protein hit has 20 more amino acids at the N-terminal as compared to the antiSMASH 3.0-predicted lanthipeptide.

<sup>5</sup> The protein hit has 3 more amino acids at the N-terminal as compared to the antiSMASH 3.0-predicted lanthipeptide.

**Table S4.** Annotation of the proteins coded by the lanthipeptide biosynthesis gene cluster of *G.kaustophilus* HTA426. As described by NCBI, protein accession numbers with the WP\_ prefix represent “non-redundant RefSeq protein records” that are “found in RefSeq genomes from multiple species”. (~) denotes that the presented protein is similar to the corresponding lanthipeptide cluster protein. Locus-tags containing underscores represent annotations of the RefSeq genome records, while those without underscores were derived from the annotations of the original genome records.

| Protein coded by a member of the lanthipeptide gene cluster | Accession number          | Locus-tag                                                                  |
|-------------------------------------------------------------|---------------------------|----------------------------------------------------------------------------|
| LanAI                                                       | BAD74571<br>WP_011229795  | GK0286<br>GK_RS18085                                                       |
| LanAII                                                      | BAD74579<br>~WP_008881441 | GK0294<br>GK_RS01950                                                       |
| LanB                                                        | BAD74585<br>~WP_014194788 | GK0300<br>GK_RS18110                                                       |
| LanBII                                                      | ~WP_014194788             | Not annotated on the original genome<br>In Refseq: GK_RS01970 <sup>1</sup> |
| LanC                                                        | BAD74589<br>WP_041467776  | GK0304<br>GK_RS01985                                                       |
| LanT                                                        | BAD74588<br>WP_011229812  | GK0303<br>GK_RS01980                                                       |
| LanK                                                        | BAD74592<br>WP_011229815  | GK0307<br>GK_RS01995                                                       |
| LanR                                                        | BAD74591<br>WP_004888808  | GK0306<br>GK_RS01990                                                       |
| LanI                                                        | BAD74594<br>~WP_008881434 | GK0309<br>GK_RS02005                                                       |
| LanF                                                        | BAD74597<br>WP_008881431  | GK0312<br>GK_RS02020                                                       |
| LanE                                                        | BAD714596<br>WP_008881432 | GK0311<br>GK_RS02015                                                       |
| LanG                                                        | BAD74595<br>WP_004888811  | GK0310<br>GK_RS02010                                                       |

<sup>1</sup> The position of the gene annotated on the RefSeq genome differs from that predicted by antiSMASH 3.0. On the RefSeq genome, the position of the gene is (328676..329895), while the position predicted by antiSMASH 3.0 is (328679..329833).

**Table S5.** Annotation of the proteins coded by the lanthipeptide biosynthesis gene cluster of *G. thermodenitrificans* NG80-2. As described by NCBI, protein accession numbers with the WP\_ prefix represent “non-redundant RefSeq protein records” that are “found in RefSeq genomes from multiple species”. Locus-tags containing “RS” represent annotations of the RefSeq genome records, while the others were derived from the annotations of the original genome records.

| Protein coded by a member of the lanthipeptide gene cluster | Accession number | Locus-tag                 |
|-------------------------------------------------------------|------------------|---------------------------|
| GeoAI                                                       | ABO65649         | GTNG_0265                 |
|                                                             | WP_008881441     | GTNG_RS18005              |
| GeoB                                                        | ABO65650         | GTNG_0266                 |
|                                                             | WP_011886696     | GTNG_RS01590              |
| GeoC                                                        | ABO65652         | GTNG_0268                 |
|                                                             | WP_011886697     | GTNG_RS01600              |
| GeoTI                                                       | ABO65651         | GTNG_0267                 |
|                                                             | WP_008881438     | GTNG_RS01595              |
| GeoK                                                        | ABO65654         | GTNG_0270                 |
|                                                             | WP_011886698     | GTNG_RS01610              |
| GeoR                                                        | ABO65653         | GTNG_0269                 |
|                                                             | WP_008881436     | GTNG_RS01605              |
| GeoI                                                        | ABO65655         | GTNG_0271                 |
|                                                             | WP_011886699     | GTNG_RS01615              |
| GeoF                                                        | ABO65658         | GTNG_0274                 |
|                                                             | WP_011886702     | GTNG_RS01630              |
| GeoE                                                        | ABO65657         | GTNG_0273                 |
|                                                             | WP_011886701     | GTNG_RS01625              |
| GeoG                                                        | ABO65656         | GTNG_0272                 |
|                                                             | WP_041264183     | GTNG_RS01620 <sup>1</sup> |

<sup>1</sup> The position of the gene annotated on the RefSeq genome differs from that annotated on the original genome and predicted by antiSMASH 3.0. On the RefSeq genome, the position of the gene is complement (309209..309997), while based on the original genome annotation, as well as the antiSMASH 3.0, the position of the gene is complement (309209..309823).

**Table S6.** The set of previously described lanthipeptides that have supported the predictions of antiSMASH.

| Bacterial species, strain (lanthipeptide reference number) | Refseq genome accession number | Annotation of the predicted lanthipeptide      |                                        | Matching lanthipeptide <sup>1</sup> (100% identical) | Supportive reference <sup>2</sup> |
|------------------------------------------------------------|--------------------------------|------------------------------------------------|----------------------------------------|------------------------------------------------------|-----------------------------------|
|                                                            |                                | Original genome record                         | RefSeq genome record                   |                                                      |                                   |
| <i>Bacillus clausii</i> KSM-K16                            | NC_006582                      | Unannotated                                    | "Gallidermin/nisin family lantibiotic" | - <sup>3</sup>                                       | NCBI                              |
| <i>Bacillus megaterium</i> QM B1551 (I-II)                 | NC_014023                      | "Antibiotic protein, putative"                 | "Gallidermin/nisin family lantibiotic" | - <sup>3</sup>                                       | NCBI, and [31]                    |
| <i>Bacillus subtilis</i> BSn5                              | NC_014976                      | "Hypothetical"                                 | "Hypothetical"                         | Subtilomycin                                         | BAGEL BLAST, and [32,33]          |
| <i>Bacillus subtilis</i> spizizenii TU-B-10                | NC_016047                      | Unannotated                                    | "Gallidermin/nisin family lantibiotic" | Entianin                                             | NCBI, BAGEL BLAST, and [47]       |
| <i>Bacillus subtilis</i> spizizenii W23                    | NC_014479                      | "Hypothetical"                                 | "Gallidermin/nisin family lantibiotic" | Subtilin                                             | NCBI, and BAGEL BLAST             |
| <i>Bacillus thuringiensis</i> serovar IS5056 (I-V)         | NC_020394                      | "Hypothetical"                                 | "Hypothetical"                         | Lanthipeptides of thuricin 4A cluster                | [31]                              |
| <i>Bacillus thuringiensis</i> YBT-1518 (I-II)              | NC_022873                      | "Antibiotic protein, putative"                 | "Gallidermin/nisin family lantibiotic" | - <sup>3</sup>                                       | NCBI                              |
| <i>Geobacillus kaustophilus</i> HTA426 (I)                 | NC_006510                      | "Lantibiotic precursor"                        | "Gallidermin/nisin family lantibiotic" | - <sup>3</sup>                                       | NCBI, [15], and [34]              |
| <i>Geobacillus kaustophilus</i> HTA426 (II)                | NC_006510                      | "Lantibiotic precursor"                        | "Lantibiotic nisin-A"                  | - <sup>3</sup>                                       | NCBI, and [15]                    |
| <i>Geobacillus thermodenitrificans</i> NG80_2              | NC_009328                      | "Lantibiotic antimicrobial precursor peptide"  | "Gallidermin/nisin family lantibiotic" | 100% geobacillin I                                   | NCBI, and [34]                    |
| <i>Lactococcus lactis</i> CV56                             | NC_017486                      | "Nisin precursor NisinA"                       | "Gallidermin/nisin family lantibiotic" | Nisin A                                              | NCBI, BAGEL BLAST, [15], and [35] |
| <i>Lactococcus lactis</i> IO                               | NC_020450                      | "Lantibiotic antimicrobial precursor"          | "Gallidermin/nisin family lantibiotic" | Nisin Z                                              | NCBI, and BAGEL BLAST             |
| <i>Paenibacillus polymyxa</i> E681                         | NC_014483                      | "Lantibiotic paenilan precursor peptide"       | "Gallidermin family protein"           | Paenilan                                             | NCBI, and [36]                    |
| <i>Staphylococcus aureus</i> 11819-97 (I)                  | NC_017351                      | "Lantibiotic gallidermin"                      | "Gallidermin/nisin family lantibiotic" | BsaA2                                                | NCBI, and BAGEL BLAST             |
| <i>Staphylococcus aureus</i> Bmb9393 (I)                   | NC_021670                      | "Gallidermin/nisin family lantibiotic"         | "Gallidermin/nisin family lantibiotic" | BsaA2                                                | NCBI, and BAGEL BLAST             |
| <i>Staphylococcus aureus</i> COL (I)                       | NC_002951                      | "Lantibiotic epidermin precursor EpiA"         | "Gallidermin/nisin family lantibiotic" | BsaA2                                                | NCBI, and BAGEL BLAST             |
| <i>Staphylococcus aureus</i> ED133 (I)                     | NC_017337                      | "Hypothetical"                                 | "Gallidermin/nisin family lantibiotic" | BacCH91                                              | NCBI, BAGEL BLAST, and [81]       |
| <i>Staphylococcus aureus</i> ED133 (II)                    | NC_017337                      | "Hypothetical"                                 | "Gallidermin/nisin family lantibiotic" | - <sup>3</sup>                                       | NCBI                              |
| <i>Staphylococcus aureus</i> LGA251 (I-II)                 | NC_017349                      | "Lantibiotic precursor"                        | "Gallidermin/nisin family lantibiotic" | - <sup>3</sup>                                       | NCBI                              |
| <i>Staphylococcus aureus</i> M1 (I)                        | NC_021059                      | "Lanthionine precursor peptide LanA"           | "Gallidermin/nisin family lantibiotic" | BsaA2                                                | NCBI, and BAGEL BLAST             |
| <i>Staphylococcus aureus</i> MSSA476 (I)                   | NC_002953                      | "Putative isochorismatase"                     | "Gallidermin/nisin family lantibiotic" | BsaA2                                                | NCBI, and BAGEL BLAST             |
| <i>Staphylococcus aureus</i> MW2 (I)                       | NC_003923                      | "Hypothetical protein, similar to gallidermin" | "Gallidermin/nisin family lantibiotic" | BsaA2                                                | NCBI, and BAGEL BLAST             |

|                                                           |           |                                                         |                                             |                |                                         |
|-----------------------------------------------------------|-----------|---------------------------------------------------------|---------------------------------------------|----------------|-----------------------------------------|
|                                                           |           | precursor"                                              |                                             |                |                                         |
| <i>Staphylococcus aureus</i><br>NCTC 8325 (I)             | NC_007795 | "Gallidermin<br>superfamily epiA,<br>putative"          | "Gallidermin superfamily<br>epiA, putative" | BsaA2          | NCBI, and<br>BAGEL BLAST                |
| <i>Staphylococcus aureus</i><br>Newman (I)                | NC_009641 | "Lantibiotic precursor"                                 | "Gallidermin/nisin family<br>lantibiotic"   | BsaA2          | NCBI, and<br>BAGEL BLAST                |
| <i>Staphylococcus aureus</i><br>RF122 (I)                 | NC_007622 | "Hypothetical"                                          | "Gallidermin/nisin family<br>lantibiotic"   | BacCH91        | NCBI, [15], and<br>[81]                 |
| <i>Staphylococcus aureus</i><br>RF122 (II)                | NC_007622 | "Hypothetical"                                          | "Gallidermin/nisin family<br>lantibiotic"   | - <sup>3</sup> | NCBI                                    |
| <i>Staphylococcus aureus</i><br>T0131 (I)                 | NC_017347 | "Lantibiotic"                                           | "Gallidermin/nisin family<br>lantibiotic"   | BsaA2          | NCBI, and<br>BAGEL BLAST                |
| <i>Staphylococcus aureus</i><br>TW20 (I)                  | NC_017331 | "Lantibiotic precursor"                                 | "Gallidermin/nisin family<br>lantibiotic"   | BsaA2          | NCBI, and<br>BAGEL BLAST                |
| <i>Staphylococcus aureus</i><br>USA300 FPR3757 (I)        | NC_007793 | "Lantibiotic epidermin<br>biosynthesis protein<br>EpiA" | "Gallidermin/nisin family<br>lantibiotic"   | BsaA2          | NCBI, and<br>BAGEL BLAST                |
| <i>Staphylococcus aureus</i><br>USA300_TCH1516 (I)        | NC_010079 | "Lantibiotic epidermin<br>EpiA"                         | "Gallidermin/nisin family<br>lantibiotic"   | BsaA2          | NCBI, and<br>BAGEL BLAST                |
| <i>Staphylococcus aureus</i><br>VC40 (I)                  | NC_016912 | "Lantibiotic epidermin<br>biosynthesis protein<br>EpiA" | "Gallidermin/nisin family<br>lantibiotic"   | BsaA2          | NCBI, and<br>BAGEL BLAST                |
| <i>Staphylococcus aureus</i><br>Z172 (I)                  | NC_022604 | "Lanthionine precursor<br>peptide LanA"                 | "Gallidermin/nisin family<br>lantibiotic"   | BsaA2          | NCBI, and<br>BAGEL BLAST                |
| <i>Streptococcus</i><br><i>intermedius</i> C270           | NC_022237 | "Hypothetical"                                          | "Gallidermin/nisin family<br>lantibiotic"   | - <sup>3</sup> | NCBI                                    |
| <i>Streptococcus</i><br><i>pasteurianus</i> ATCC<br>43144 | NC_015600 | "Nisin U lantibiotic"                                   | "Gallidermin/nisin family<br>lantibiotic"   | - <sup>3</sup> | NCBI                                    |
| <i>Streptococcus pyogenes</i><br>MGAS6180                 | NC_007296 | "Lantibiotic"                                           | "Gallidermin/nisin family<br>lantibiotic"   | Streptin       | NCBI, BAGEL<br>BLAST, [15],<br>and [84] |
| <i>Streptococcus pyogenes</i><br>MGAS9429                 | NC_008021 | "Lantibiotic<br>biosynthesis sensor<br>protein"         | "Gallidermin/nisin family<br>lantibiotic"   | Streptin       | NCBI, BAGEL<br>BLAST, and<br>[84]       |
| <i>Streptococcus pyogenes</i><br>MGAS10270                | NC_008022 | "Lantibiotic srtA<br>precursor"                         | "Gallidermin/nisin family<br>lantibiotic"   | Streptin       | NCBI, BAGEL<br>BLAST, [15],<br>and [84] |
| <i>Streptococcus pyogenes</i><br>MGAS10750                | NC_008024 | "Lantibiotic srtA<br>precursor"                         | "Gallidermin/nisin family<br>lantibiotic"   | - <sup>3</sup> | NCBI, and [15]                          |
| <i>Streptococcus suis</i> JS14                            | NC_017618 | Unannotated                                             | "Gallidermin/nisin family<br>lantibiotic"   | Suicin 90-1330 | NCBI, and [96]                          |
| <i>Streptococcus suis</i><br>SC070731                     | NC_020526 | Unannotated                                             | "Gallidermin/nisin family<br>lantibiotic"   | Suicin 90-1330 | NCBI, and [96]                          |

<sup>1</sup> Identity to experimentally verified lanthipeptide. <sup>2</sup> Supportive reference represents literature study(ies) where the respective lanthipeptide was identified, annotation(s) of the genome deposited in NCBI (RefSeq/GenBank), and/or the results of BAGEL BLAST. <sup>3</sup> (-) indicates that among experimentally verified lanthipeptides, there is not any that has 100% identity to the respective lanthipeptide.



### S.2.3.1\*. Identification of *Bacillus*-associated lanthipeptide gene clusters

#### S.2.3.1.1. *B. clausii* KSM-K16

The nucleotide (nt) sequence of the gene coding for the antiSMASH-predicted lanthipeptide (Table S1) is 100% identical to “ABC\_RS22115” annotated on the RefSeq as coding for a class-I lanthipeptide (Table S2). Thus, the RefSeq annotation supports our analysis (Table S6). The core sequence of the predicted lanthipeptide was briefly mentioned by van Heel *et al*, 2016 [30]. The blastp analysis indicated that the predicted lanthipeptide is 56% identical to clausin (Table 2). We noticed that clausin has not been reported in BAGEL database; therefore, we recommend including it as a class-I lanthipeptide.

#### S.2.3.1.2. *B. megaterium* QM B1551

The aa sequences of the two antiSMASH-predicted lanthipeptides are identical, but the nt sequences of their two coding-genes are not (Table S1). The nt sequence of the gene coding for lanthipeptide (I) showed 100% identity to “BMQ\_RS27575”, and that coding for lanthipeptide (II) showed 100% identity to “BMQ\_RS27580”. These genes have been annotated in the RefSeq record as coding for class-I lanthipeptides (Table S2). Both lanthipeptides showed 56% identity to gallidermin as indicated by BAGEL BLAST (Table 2). It is noteworthy that using BAGEL3, Xin *et al*, 2015 identified one of the putative lanthipeptides [31] presented in the current study. Thus, the RefSeq annotation and results of Xin *et al*, 2015 support our analysis (Table S6).

#### S.2.3.1.3. *B. subtilis spizizenii* DSM 15029T (TU-B-10)

Our analysis has indicated points that are worth noting, as discussed below.

Using antiSMASH analysis, the gene coding for entianin was predicted (Table S1). In addition to the original and RefSeq genome sequence records of the strain, there is also a record on the entianin gene cluster that belongs to the same strain, separately deposited in NCBI under the accession number (HQ871873). We noticed that the entianin-coding gene has been annotated on the RefSeq as “GYO\_RS39160” that codes for a class-I lanthipeptide. On the other hand, the coding gene in the entianin cluster record has been annotated and named as “*etnS*” coding for “EtnS” (AEK64494). The nt sequences of “GYO\_RS39160” and “*etnS*” are identical and they both code for the same peptide. The two separate records related to the lanthipeptide resulted in having different tags/names for the same gene and its coded lanthipeptide. The entianin cluster (HQ871873) of the strain was sequenced by Fuchs *et al* and deposited in NCBI in 2011 [47] and the designation of the strain displayed for the record is DSM 15029<sup>T</sup>. The antimicrobial activity of the entianin cluster has been experimentally proved [47]. On the other hand, the original genome (CP002905) was sequenced by Earl *et al* in 2012 [46], whereas the RefSeq genome was annotated in 2017, and the stated designation of the strain for both genome records is (TU-B-10). Accordingly, a re-evaluation of naming the gene and its lanthipeptide product in the RefSeq needs to be considered to match the description of the experimentally-verified entianin cluster (HQ871873). Moreover, since the RefSeq genome record shows only one of the designations of the strain; TU-B-10 while the record of the entianin cluster shows the other designation; DSM 15029<sup>T</sup>, we recommend to present both designations in each record in order to avoid the confusion. Interestingly, the antibacterial activity of entianin has been experimentally confirmed; it is highly active against several Gram-positive bacteria [47].

#### S.2.3.1.4. *B. subtilis spizizenii* W23

The nt sequence of the gene coding for the antiSMASH-predicted lanthipeptide (Table S1) is 100% identical to “BSUW23\_RS16845” annotated on the RefSeq as coding for a class-I

lanthipeptide (Table S2). The RefSeq annotation thus supports our analysis (Table S6). BAGEL BLAST indicated that the predicted lanthipeptide is 100% identical to subtilin (Table 2; Table S2) and 95% to entianin.

#### S.2.3.1.5. *B. thuringiensis* YBT-1518

The antiSMASH analysis indicated that the class-I lanthipeptide cluster coded on the chromosome of strain YBT-1518 has two putative genes coding for two different lanthipeptides. The nt sequence of the gene coding for the predicted lanthipeptide (I) (Table S1) is 100% identical to “YBT1518\_RS19670”, and that of the gene coding for lanthipeptide (II) is 100% identical to “YBT1518\_RS19675”. Both genes have been annotated on the RefSeq genome as coding for class-I lanthipeptides. The RefSeq annotation thus supports our analysis (Table S6). Based on the analysis using BAGEL BLAST, the predicted lanthipeptides I and II are 53% and 51% identical to gallidermin, respectively (Table 2).

#### S.2.3.2. Identification of *Geobacillus*-associated lanthipeptide gene clusters

##### S.2.3.2.1. *G. kaustophilus* HTA426

The nt sequence of the gene coding for the antiSMASH-predicted lanthipeptide (I) (Table S1) is 100% identical to “GK\_RS18085” annotated on the RefSeq genome as coding for a class-I lanthipeptide. Therefore, the genome annotation supports our results (Table S6). BAGEL BLAST showed that lanthipeptide (I) is 91% identical to the experimentally characterized antimicrobially-active lanthipeptide; geobacillin I (ABO65649) produced by *G. thermodenitrificans* NG80-2 [34]. Garg *et al* 2012 reported the same lanthipeptide for strain HTA426 [34], and this in turn further supports our analysis (Table 2, Table S6).

#### S.2.3.3. Identification of *Lactococcus*-associated lanthipeptide gene clusters

##### S.2.3.3.1. *L. lactis* strains CV56 and IO-1

The nt sequence of the gene coding for the antiSMASH-predicted lanthipeptide of strain CV56 (Table S1) is 100% identical to “CVCAS\_RS03115”, and that coding for the predicted lanthipeptide of strain IO-1 (Table S1) is 100% identical to “LILO\_RS03015”. Both genes have been annotated in the RefSeq genome records as coding for class-I lanthipeptides. The RefSeq annotations thus support our analysis (Table S6). BAGEL BLAST showed that the predicted lanthipeptide of strain CV56 is 100% identical to nisin A (Table 2). Our results agree with those of Gao *et al*, 2011 [35] and Marsh *et al*, 2010 [15] (Table S6). On the other hand, BAGEL BLAST showed that the predicted lanthipeptide of strain IO-1 is 100% identical to nisin Z (Table 2).

#### S.2.3.4. Identification of *Paenibacillus*-associated lanthipeptide gene clusters

##### S.2.3.4.1. *P. polymyxa* E681

The nt sequence of the gene coding for the predicted lanthipeptide (Table S1) is 100% identical to “PPE\_RS07020”, which has been annotated on the RefSeq as coding for a class-I lanthipeptide (Table S2). The aa sequence of the characterized class-I lanthipeptide; named paenilan produced by strain E681 [36] is identical to that inferred in our study for the same strain (Table S2). This in turn supports our analysis (Table S6). The antibacterial activity of paenilan has been experimentally verified by Park *et al* [36].

#### S.2.3.5. Identification of *Staphylococcus*-associated lanthipeptide gene clusters

#### S.2.3.5.1. *S. aureus* 11819-97

The nt sequence of the gene coding for the antiSMASH-predicted lanthipeptide (I) (Table S1) is 100% identical to “MS7\_RS09745” annotated on the RefSeq genome as coding for a class-I lanthipeptide. The annotation of the genome thus supports our analysis (Table S6). Moreover, BAGEL BLAST showed that lanthipeptide (I) is 100% identical to BsaA2 (Table 2). The antimicrobial activity of BsaA2 has been experimentally verified in other *S. aureus* strains by Daly *et al*, 2010 [8].

The nt sequence of the gene coding for the antiSMASH-predicted lanthipeptide (II) (Table S1) is 100% identical to “MS7\_RS09750” annotated on the RefSeq genome as coding for a class-I lanthipeptide (Table S2). However, in RefSeq and consequently also in antiSMASH, the start codon has been translated into an incorrect aa in the presented aa sequence. The nt sequence presented in RefSeq and antiSMASH showed the first codon as “TTG”, which codes for the aa leucine (L) and not the reported methionine (M). Therefore, we edited the start aa of the predicted lanthipeptide (II) into the correct one (L) (Table S1). BAGEL BLAST showed that lanthipeptide (II) is 83% identical to BsaA2 (Table 2).

#### S.2.3.5.2. *S. aureus* COL

The nt sequence of the gene coding for the antiSMASH-predicted lanthipeptide (I) (Table S1) is 100% identical to “SACOL\_RS09635” annotated on the RefSeq genome as coding for a class-I lanthipeptide. The annotation of the genome thus supports our analysis (Table S6). Moreover, BAGEL BLAST showed that lanthipeptide (I) is 100% identical to BsaA2 (Table 2). Daly *et al* 2010 reported strain COL as a putative producer of BsaA2 [8].

The nt sequence of the gene coding for the antiSMASH-predicted lanthipeptide (II) (Table S1) is 100% identical to “SACOL\_RS09645” annotated on the RefSeq genome as coding for a class-I lanthipeptide (Table S2). Again, we made the same correction of the aa as we did for lanthipeptide (II) of strain 11819-97 (Table S1). BAGEL BLAST showed that lanthipeptide (II) is 79% identical to BsaA2 (Table 2).

#### S.2.3.5.3. *S. aureus* ED133

The nt sequence of the gene coding for the antiSMASH-predicted lanthipeptide (I) (Table S1) is 100% identical to “SAOV\_RS09475”, and that of the other predicted gene coding for lanthipeptide (II) (Table S1) is 100% identical to “SAOV\_RS09490”. Both genes have been annotated on the RefSeq genome as coding for a class-I lanthipeptide (Table S2), which in turn, supports our analysis (Table S6). Moreover, BAGEL BLAST showed that lanthipeptide (I) is 100% identical to BacCH91 produced by *S. aureus* strain CH91 [81] (Table 2; Table S2). On the other hand, lanthipeptide (II) is 85% identical to BsaA2 (Table 2; Table S2). Only the core sequence of lanthipeptide (II) was very briefly mentioned by van Heel *et al*, 2016 and was inferred based on an *in silico* analysis [30].

#### S.2.3.5.4. *S. aureus* M1

The nt sequence of the gene coding for the antiSMASH-predicted lanthipeptide (I) (Table S1) is 100% identical to “BN843\_RS09660” annotated on the RefSeq genome as coding for a class-I lanthipeptide. The annotation of the genome thus supports our analysis (Table S6). Moreover, BAGEL BLAST showed that lanthipeptide (I) is 100% identical to BsaA2 (Table 2).

The nt sequence of the gene coding for the antiSMASH-predicted lanthipeptide (II) (Table S1) is 100% identical to “BN843\_RS09665” annotated on the RefSeq as coding for a class-I lanthipeptide (Table S2). Here as well, we edited the start aa of the predicted lanthipeptide (II) of

strain M1 into the correct one (L) instead of M (Table S1). BAGEL BLAST showed that lanthipeptide (II) is 83% identical to BsaA2 (Table 2).

#### S.2.3.5.5. *S. aureus* MSSA476

The nt sequence of the gene coding for the antiSMASH-predicted lanthipeptide (I) (Table S1) is 100% identical to “SAS1746” which has been annotated on the RefSeq genome as coding for a class-I lanthipeptide (Table S2). The RefSeq genome annotation thus supports our analysis (Table S6). BAGEL BLAST showed that lanthipeptide (I) is 100% identical to BsaA2 (Table 2). Daly *et al.*, 2010 reported strain MSSA476 as a putative producer of BsaA2 [8].

The nt sequence of the gene coding for the antiSMASH-predicted lanthipeptide (II) (Table S1) is 100% identical to “SAS\_RS09300” annotated on the RefSeq genome as coding for a class-I lanthipeptide. Here as well, we edited the start aa of the predicted lanthipeptide (II) of strain MSSA476 into the correct one (L) instead of M (Table S1). BAGEL BLAST showed that lanthipeptide (II) is 83% identical to BsaA2 (Table 2).

#### S.2.3.5.6. *S. aureus* MW2

The nt sequence of the gene coding for the antiSMASH-predicted lanthipeptide (I) (Table S1) is 100% identical to “MW\_RS09420” annotated on the RefSeq as coding for a class-I lanthipeptide. Therefore, the RefSeq annotation supports our analysis (Table S6). BAGEL BLAST showed that lanthipeptide (I) is 100% identical to BsaA2 (Table 2). Daly *et al.*, 2010 reported strain MW2 as a putative producer of BsaA2 [8].

The nt sequence of the gene coding for the antiSMASH-predicted lanthipeptide (II) (Table S1) is 100% identical to “MW\_RS09425” annotated on the RefSeq as coding for a class-I lanthipeptide. Here as well, we edited the start aa of the predicted lanthipeptide (II) of strain MW2 into the correct one (L) instead of M (Table S1). BAGEL BLAST showed that lanthipeptide (II) is 83% identical to BsaA2 (Table 2).

#### S.2.3.5.7. *S. aureus* NCTC 8325

The nt sequence of the gene coding for the antiSMASH-predicted lanthipeptide (I) (Table S1) is 100% identical to “SAOUHSC\_01953” annotated on the RefSeq genome as coding for a class-I lanthipeptide. The annotation of the genome thus supports our analysis (Table S6). BAGEL BLAST showed that lanthipeptide (I) is 100% identical to BsaA2 (Table 2). Daly *et al.*, 2010 reported strain NCTC 8325 as a producer of BsaA2 [8].

#### S.2.3.5.8. *S. aureus* RF122

The nt sequence of the gene coding for the antiSMASH-predicted lanthipeptide (I) (Table S1) is 100% identical to “SAB\_RS08990” annotated on the RefSeq genome as coding for a class-I lanthipeptide (Table S2), which thus supports our analysis (Table S6). Based on the analysis using BAGEL BLAST, lanthipeptide (I) is 100% identical to BacCH91, and 81% identical to BsaA2. Moreover, our results agree with the findings of Marsh *et al.*, 2010 [15].

The nt sequence of the gene coding for the antiSMASH-predicted lanthipeptide (II) (Table S1) is 100% identical to “SAB\_RS08995” annotated on the RefSeq as coding for a class-I lanthipeptide (Table S2). Thus, the RefSeq annotation supports our analysis (Table S6). Based on the analysis using BAGEL BLAST, lanthipeptide (II) is 87% identical to BsaA2. Daly *et al.*, 2010 also reported strain RF122 as a producer of variants of Bsa [8].

#### S.2.3.5.9. *S. aureus* T0131

The nt sequence of the gene coding for the antiSMASH-predicted lanthipeptide (I) (Table S1) is 100% identical to “SAT0131\_RS09535” annotated on the RefSeq genome as coding for a class-I lanthipeptide. The annotation of the genome thus supports our analysis (Table S6). BAGEL BLAST showed that lanthipeptide (I) is 100% identical to BsaA2 (Table 2).

The nt sequence of the gene coding for the antiSMASH-predicted lanthipeptide (II) (Table S1) is 100% identical to “SAT0131\_RS09540” annotated on the RefSeq genome as coding for a class-I lanthipeptide. Here as well, we edited the start aa of the predicted lanthipeptide (II) of strain T0131 into the correct one (L) instead of M (Table S1). BAGEL BLAST showed that lanthipeptide (II) is 83% identical to BsaA2 (Table 2).

#### S.2.3.5.8.10. *S. aureus* strains USA300 FPR3757 and USA300\_TCH1516

The nt sequence of the gene coding for the antiSMASH-predicted lanthipeptide (I) of strain USA300\_FPR3757 (Table S1) is 100% identical to “SAUSA300\_RS09670”. For strain USA300\_TCH1516, the nt sequence of the gene coding for the predicted lanthipeptide (I) (Table S1) is 100% identical to “USA300HOU\_RS09705”. Each of “SAUSA300\_RS09670” and “USA300HOU\_RS09705” has been annotated on the RefSeq genome of the respective strain as coding for a class-I lanthipeptide. The annotation of the genome thus supports our analysis (Table S6). BAGEL BLAST showed that each of the predicted lanthipeptides is 100% identical to BsaA2 (Table 2). Daly *et al* (2010) reported that the two strains are putative producers of BsaA2 [8].

The nt sequence of the gene coding for the antiSMASH-predicted lanthipeptide (II) of strain USA300\_FPR3757 (Table S2) is 100% identical to “SAUSA300\_RS09675”, and that of the gene coding for the predicted lanthipeptide (II) of strain “USA300\_TCH1516” (Table S2) is identical to “USA300HOU\_RS09710”. Here as well, we edited the start aa of the predicted lanthipeptide (II) of both strains into the correct one (L) instead of M (Table S1). BAGEL BLAST indicated that lanthipeptide (II) of each of the strains is 83% identical to BsaA2 (Table 2).

#### S.2.3.5.8.11. *S. aureus* Z172

The nt sequence of the gene coding for lanthipeptide (I) (Table S1) is 100% identical to “SAZ172\_RS09800” annotated on the RefSeq genome as coding for a class-I lanthipeptide. The annotation of the genome thus supports our analysis (Table S6). BAGEL BLAST showed that lanthipeptide (I) is 100% identical to BsaA2 (Table 2).

The nt sequence of the antiSMASH-predicted lanthipeptide (II) (Table S1) is 100% identical to “SAZ172\_RS09810” annotated on the RefSeq genome as coding for a class-I lanthipeptide (Table S2). Here as well, we edited the start aa of the predicted lanthipeptide (II) of strain Z172 into the correct one (L) instead of M (Table S1). BAGEL BLAST showed that lanthipeptide (II) is 83% identical to BsaA2 (Table 2).

#### S.2.3.5.8.12. other strains

The aa sequence of lanthipeptide (I) is identical in strains Bmb 9393, Newman, TW20, and VC40 (Table S1). The coding genes have been annotated in the RefSeq genome record of strain Bmb 9393, as “SABB\_RS10200”; strain Newman as “NWMN\_RS09635”; strain TW20, as “SATW20\_RS09830”; and strain VC40, as “SAVC\_RS08915”. Each of the genes has been annotated as coding for a class-I lanthipeptide. Therefore, the genome annotations support our results (Table S6). Moreover, the predicted lanthipeptides showed 100% identity to the BsaA2, as indicated by BAGEL BLAST (Table 2).

The aa sequence of lanthipeptide (II) in all these strains is identical (Table S1). The coding genes have been annotated in the RefSeq genome records as coding for class-I lanthipeptides. The

nt sequence of the predicted gene coding for lanthipeptide (II) of strain Bmb 9393 is 100% identical to "SABB\_RS10205", that of strain Newman is 100% identical to "NWMN\_RS09640", that of strain TW20 is 100% identical to "SATW20\_RS09835", and that of strain VC40 is 100% identical to "SAVC\_RS08920". Here as well, we edited the start aa of the predicted lanthipeptide (II) of each of these strains into the correct one (L) instead of M (Table S1). The predicted lanthipeptides showed 83% identity to the BsaA2, as indicated by BAGEL BLAST (Table 2).

Furthermore, our analysis indicated that *S. aureus* strain LGA251 harbours a class-I lanthipeptide cluster coding for two different lanthipeptides. The putative coding genes of lanthipeptides (I) and (II) (Table S1) have been annotated on the RefSeq genome as "SARLGA251\_RS09195" and "SARLGA251\_RS09200", each of which has been annotated as coding for a class-I lanthipeptide. Therefore, RefSeq annotations support our analysis (Table S6). BAGEL BLAST indicated that lanthipeptides (I) and (II) showed 81% and 85% identity, respectively, to the BsaA2 of *S. aureus* (Table 2).

#### S.2.3.6. Identification of *Streptococcus*-associated lanthipeptide gene clusters

##### S.2.3.6.1. *S. intermedius* C270

The nt sequence of the gene coding for the antiSMASH-predicted lanthipeptide (Table S1) is 100% identical to "SII\_RS05025" annotated on the RefSeq as coding for a class-I lanthipeptide (Table S2). The RefSeq annotation, in turn, supports our analysis (Table S6). Based on the analysis using BAGEL BLAST, the predicted lanthipeptide is 81% identical to Nisin F which is produced by *L. lactis* (Table 2; Table S2).

##### S.2.3.6.2. *S. pasteurianus* ATCC 43144

The nt sequence of the gene coding for the lanthipeptide (Table S1) is 100% identical to "SGPB\_RS10680" annotated on the RefSeq as coding for a class-I lanthipeptide. The genome annotation, thus, supports our analysis (Table S6) and also confirms the results of Lin *et al.*, 2011. Based on the analysis using BAGEL BLAST, the predicted lanthipeptide is 91% similar to nisin U (Table 2). These results indicate that the antimicrobial potential of the lanthipeptide in strain ATCC 43144 should be of interest to investigate.

##### S.2.3.6.3. *S. pyogenes* MGAS9429

The nt sequence coding for the antiSMASH-predicted lanthipeptide (Table S1) is 100% identical to "MGAS9429\_RS04535" annotated on the RefSeq genome as coding for a class-I lanthipeptide (Table S2). This in turn supports our analysis (Table S6). Moreover, BAGEL BLAST indicated that the predicted lanthipeptide is 100% identical to streptin (Table 2). Therefore, we suggest considering *S. pyogenes* strain MGAS2096 as another potential streptin-producer.

##### S.2.3.6.4. Other strains of *S. pyogenes*

The aa sequences of the lanthipeptides of strains MGAS6180, MGAS10270 and MGAS10750 are identical (Table S1). The nt sequence of the gene coding for the lanthipeptide of strain MGAS6180 (Table S1) is 100% identical to "M28\_RS03970". That of the gene coding for the lanthipeptide of strain MGAS10270 (Table S1) is 100% identical to "MGAS10270\_RS04550". Finally, the nt sequence of the gene coding for the lanthipeptide of strain MGAS10750 (Table S1) is identical to "MGAS10750\_RS04710". These 3 genes have been annotated in the RefSeq genome records as coding for class-I lanthipeptides. Therefore, our results are supported by the annotation of the genome records of the three strains (Table S6). BAGEL BLAST indicated that the the lanthipeptides of strains MGAS6180 and MGAS10270 are 100% identical to streptin, while

that of strain MGAS10750 is 98% identical to streptin (Table 2). The results of antiSMASH analysis agree with the findings of Marsh *et al.*, 2010 [15].

#### S.2.3.6.5. *S. suis* strains JS14 and SC070731

The nt sequences of the gene coding for the antiSMASH-predicted lanthipeptide of strain JS14, and that coding for the lanthipeptide of strain SC070731 are identical (Table S1). The coding genes have been annotated as “SSUJS14\_RS10730” on the RefSeq genome of strain JS14, and as “NJAUSS\_RS10650” on that of strain SC070731. Each of these genes codes for a class-I lanthipeptide. Therefore, the annotation of the RefSeq genome supports our analysis (Table S6). Each of the predicted lanthipeptides is 100% identical to suicin 90-1330 produced by *S. suis* strain 90-1330 [96] (Table 2). We noticed that suicin 90-1330 has not been reported in BAGEL databases. Since the lanthipeptide production potential of strains JS14 and SC070731 has not been investigated, we suggest the two strains as potential lanthipeptide producers.

\* The section number corresponds to that in the main text but preceded with an “S.” for “supplementary”.

#### Additional files

- Software source code is available at <http://130.235.46.10/Lanthipeptides/Software/>
- Graphical illustrations of the antiSMASH output are available at <http://130.235.46.10/Lanthipeptides/>
